# Supplementary material for: Statin use and all-cancer survival: prospective results from the Women's Health Initiative
Source: PubMed Central journal article supplement — Br J Cancer. 2016 Jun 9;115(1):129–35. doi: 10.1038/bjc.2016.149 (PMC4931370; doi:10.1038/bjc.2016.149), 2016-06-09

Supplementary Figure 2.

| Subgroup                 | Current statin use | Never used statins | HR(95%CI)              | P                |
|--------------------------|--------------------|--------------------|------------------------|------------------|
| <b>Main effect</b>       | <b>709(2.33%)</b>  | <b>2443(3.80%)</b> | <b>0.78(0.71,0.86)</b> | <b>&lt;0.001</b> |
| <b>Age at enrollment</b> |                    |                    |                        | <b>0.17</b>      |
| 50-<60                   | 112(1.17%)         | 484(2.24%)         | 0.67(0.53,0.85)        |                  |
| 60-<70                   | 374(2.39%)         | 1169(3.88%)        | 0.78(0.68,0.90)        |                  |
| >= 70                    | 223(4.26%)         | 790(6.29%)         | 0.83(0.70,0.99)        |                  |
| <b>Age at diagnosis</b>  |                    |                    |                        | <b>0.43</b>      |
| <70                      | 230(1.43%)         | 1075(2.84%)        | 0.77(0.65,0.91)        |                  |
| 70-<80                   | 338(2.79%)         | 1086(4.77%)        | 0.75(0.65,0.86)        |                  |
| >= 80                    | 141(6.41%)         | 282(7.68%)         | 0.90(0.71,1.13)        |                  |
| <b>BMI</b>               |                    |                    |                        | <b>0.92</b>      |
| <25                      | 182(2.06%)         | 840(3.48%)         | 0.73(0.61,0.88)        |                  |
| 25-<30                   | 273(2.49%)         | 809(3.74%)         | 0.88(0.75,1.03)        |                  |
| 30-<35                   | 149(2.28%)         | 486(4.35%)         | 0.69(0.55,0.86)        |                  |
| >= 35                    | 97(2.53%)          | 284(4.14%)         | 0.78(0.59,1.03)        |                  |
| <b>Race/ethnicity</b>    |                    |                    |                        | <b>0.87</b>      |
| White                    | 627(2.33%)         | 2140(3.72%)        | 0.79(0.71,0.87)        |                  |
| Black                    | 43(2.38%)          | 162(4.55%)         | 0.70(0.48,1.01)        |                  |
| Hispanic                 | 16(2.73%)          | 59(4.52%)          | 0.64(0.32,1.28)        |                  |
| Asian                    | 14(1.96%)          | 44(4.13%)          | 0.83(0.45,1.56)        |                  |
| <b>Tumor stage</b>       |                    |                    |                        | <b>0.12</b>      |
| Insitu                   | 24(0.43%)          | 35(0.34%)          | 1.07(0.58,2.00)        |                  |
| Local                    | 145(0.85%)         | 393(1.12%)         | 0.81(0.64,1.01)        |                  |
| Regional                 | 156(3.12%)         | 562(4.82%)         | 0.72(0.59,0.89)        |                  |
| Distant                  | 301(16.63%)        | 1107(22.09%)       | 0.97(0.83,1.13)        |                  |
| <b>Smoking</b>           |                    |                    |                        | <b>0.18</b>      |
| Never                    | 265(1.83%)         | 975(3.17%)         | 0.72(0.62,0.84)        |                  |
| Past                     | 337(2.48%)         | 1106(3.83%)        | 0.85(0.74,0.98)        |                  |
| Current                  | 93(4.61%)          | 339(8.72%)         | 0.97(0.60,1.59)        |                  |
| <b>Physical activity</b> |                    |                    |                        | <b>0.16</b>      |
| <100                     | 161(2.65%)         | 524(4.27%)         | 0.83(0.68,1.03)        |                  |
| 100-<500                 | 205(2.50%)         | 670(4.13%)         | 0.81(0.68,0.97)        |                  |
| 500-<1200                | 184(2.24%)         | 601(3.34%)         | 0.84(0.70,1.02)        |                  |
| >= 1200                  | 120(2.01%)         | 477(3.53%)         | 0.64(0.51,0.81)        |                  |
| <b>HT use</b>            |                    |                    |                        | <b>0.17</b>      |
| Never                    | 279(2.61%)         | 942(4.50%)         | 0.70(0.60,0.82)        |                  |
| E-alone use              | 221(2.61%)         | 761(4.32%)         | 0.86(0.72,1.03)        |                  |
| E+P use                  | 208(1.85%)         | 737(2.87%)         | 0.82(0.69,0.99)        |                  |
| <b>NSAID use*</b>        |                    |                    |                        | <b>0.01</b>      |
| No                       | 378(2.05%)         | 1622(3.90%)        | 0.72(0.63,0.82)        |                  |
| Yes                      | 331(2.77%)         | 821(3.44%)         | 0.92(0.80,1.06)        |                  |
| <b>Aspirin use*</b>      |                    |                    |                        | <b>0.11</b>      |
| No                       | 366(2.61%)         | 1851(4.23%)        | 0.77(0.68,0.88)        |                  |
| Yes                      | 343(2.09%)         | 592(2.70%)         | 0.90(0.78,1.05)        |                  |
| <b>Diabetes status^</b>  |                    |                    |                        | <b>0.91</b>      |
| No                       | 586(2.18%)         | 2244(3.65%)        | 0.78(0.70,0.86)        |                  |
| Yes                      | 123(3.43%)         | 197(7.13%)         | 0.79(0.60,1.05)        |                  |
| <b>CHD status^</b>       |                    |                    |                        | <b>0.20</b>      |
| No                       | 542(2.01%)         | 2226(3.66%)        | 0.75(0.67,0.83)        |                  |
| Yes                      | 160(4.79%)         | 198(6.43%)         | 0.89(0.69,1.14)        |                  |
| <b>Study</b>             |                    |                    |                        | <b>0.48</b>      |
| OS                       | 292(2.06%)         | 1040(3.45%)        | 0.81(0.70,0.94)        |                  |
| CT                       | 417(2.56%)         | 1403(4.11%)        | 0.76(0.66,0.86)        |                  |

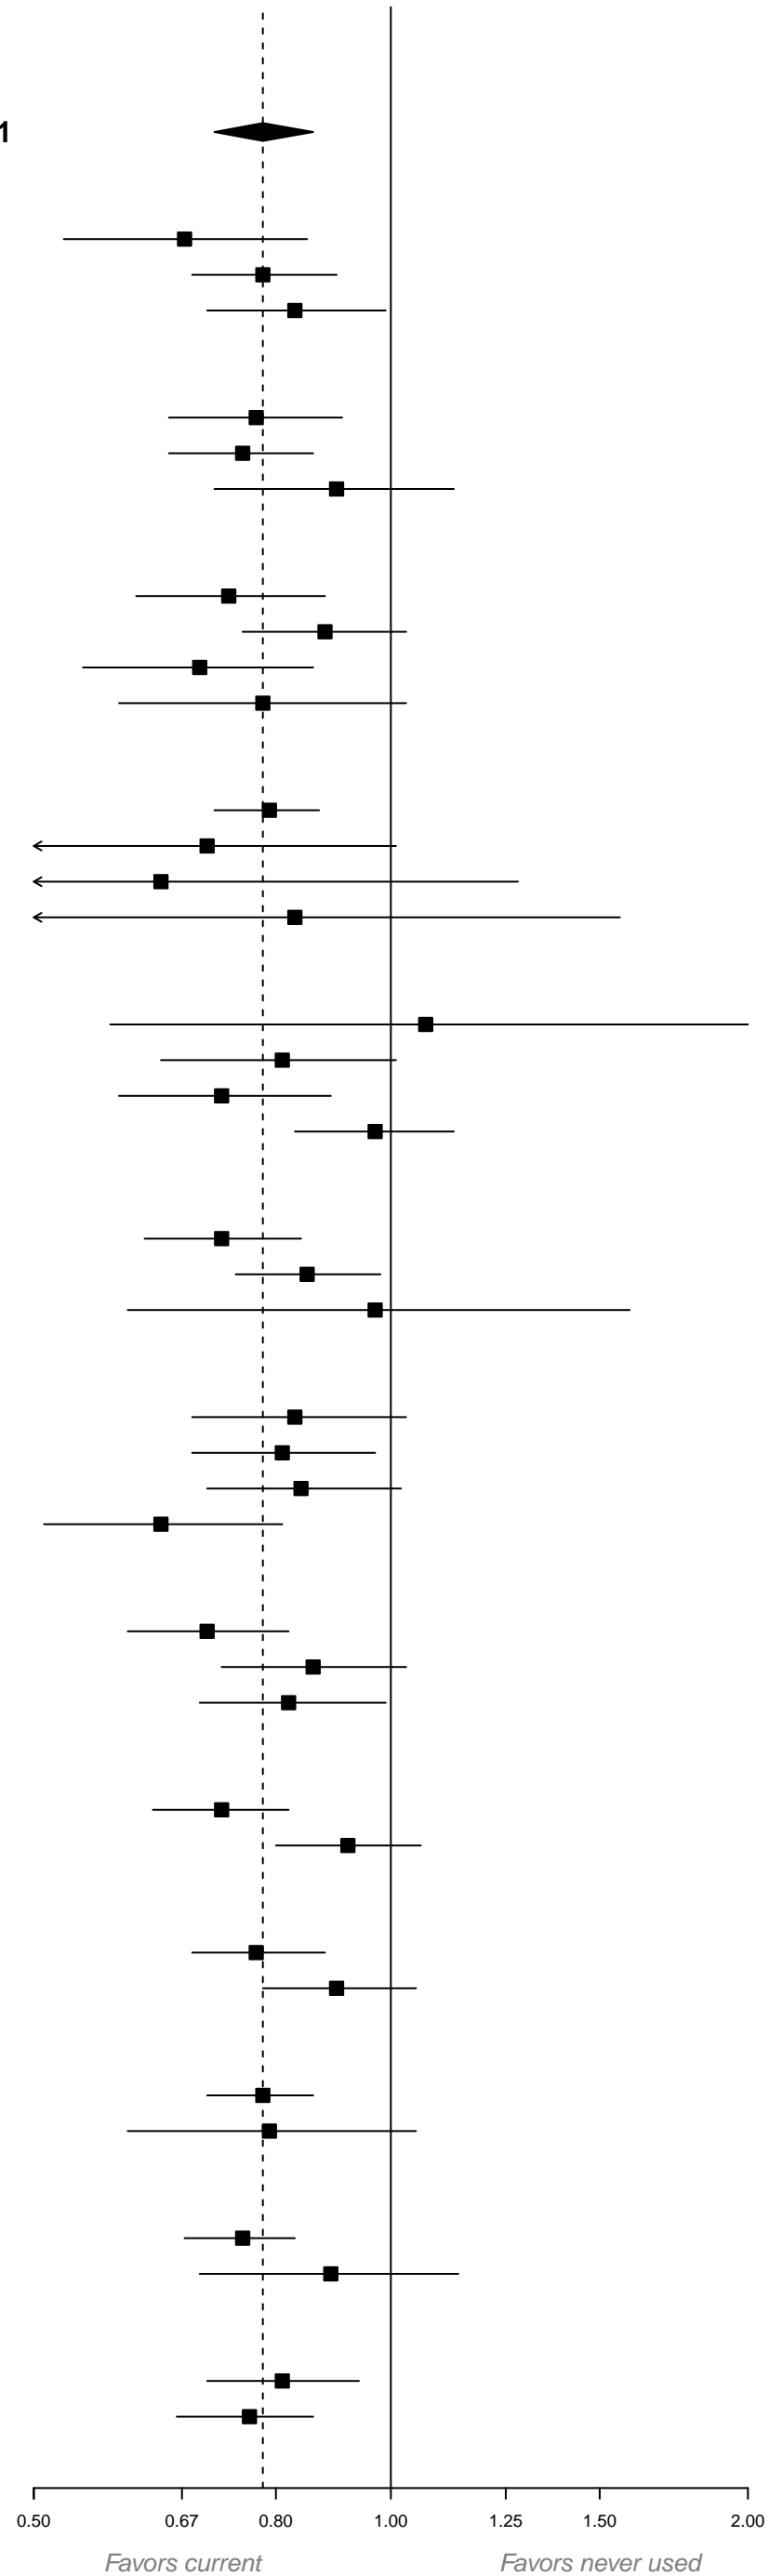

Supplement: bjc2016149x2.pdf [file bjc2016149x2.pdf]
