# Supplementary figures and images for: Statin use and all-cancer survival: prospective results from the Women's Health Initiative
Source: PubMed Central journal article supplement — Br J Cancer. 2016 Jun 9;115(1):129–35. doi: 10.1038/bjc.2016.149 (PMC4931370; doi:10.1038/bjc.2016.149), 2016-06-09

Supplementary Figure 1.

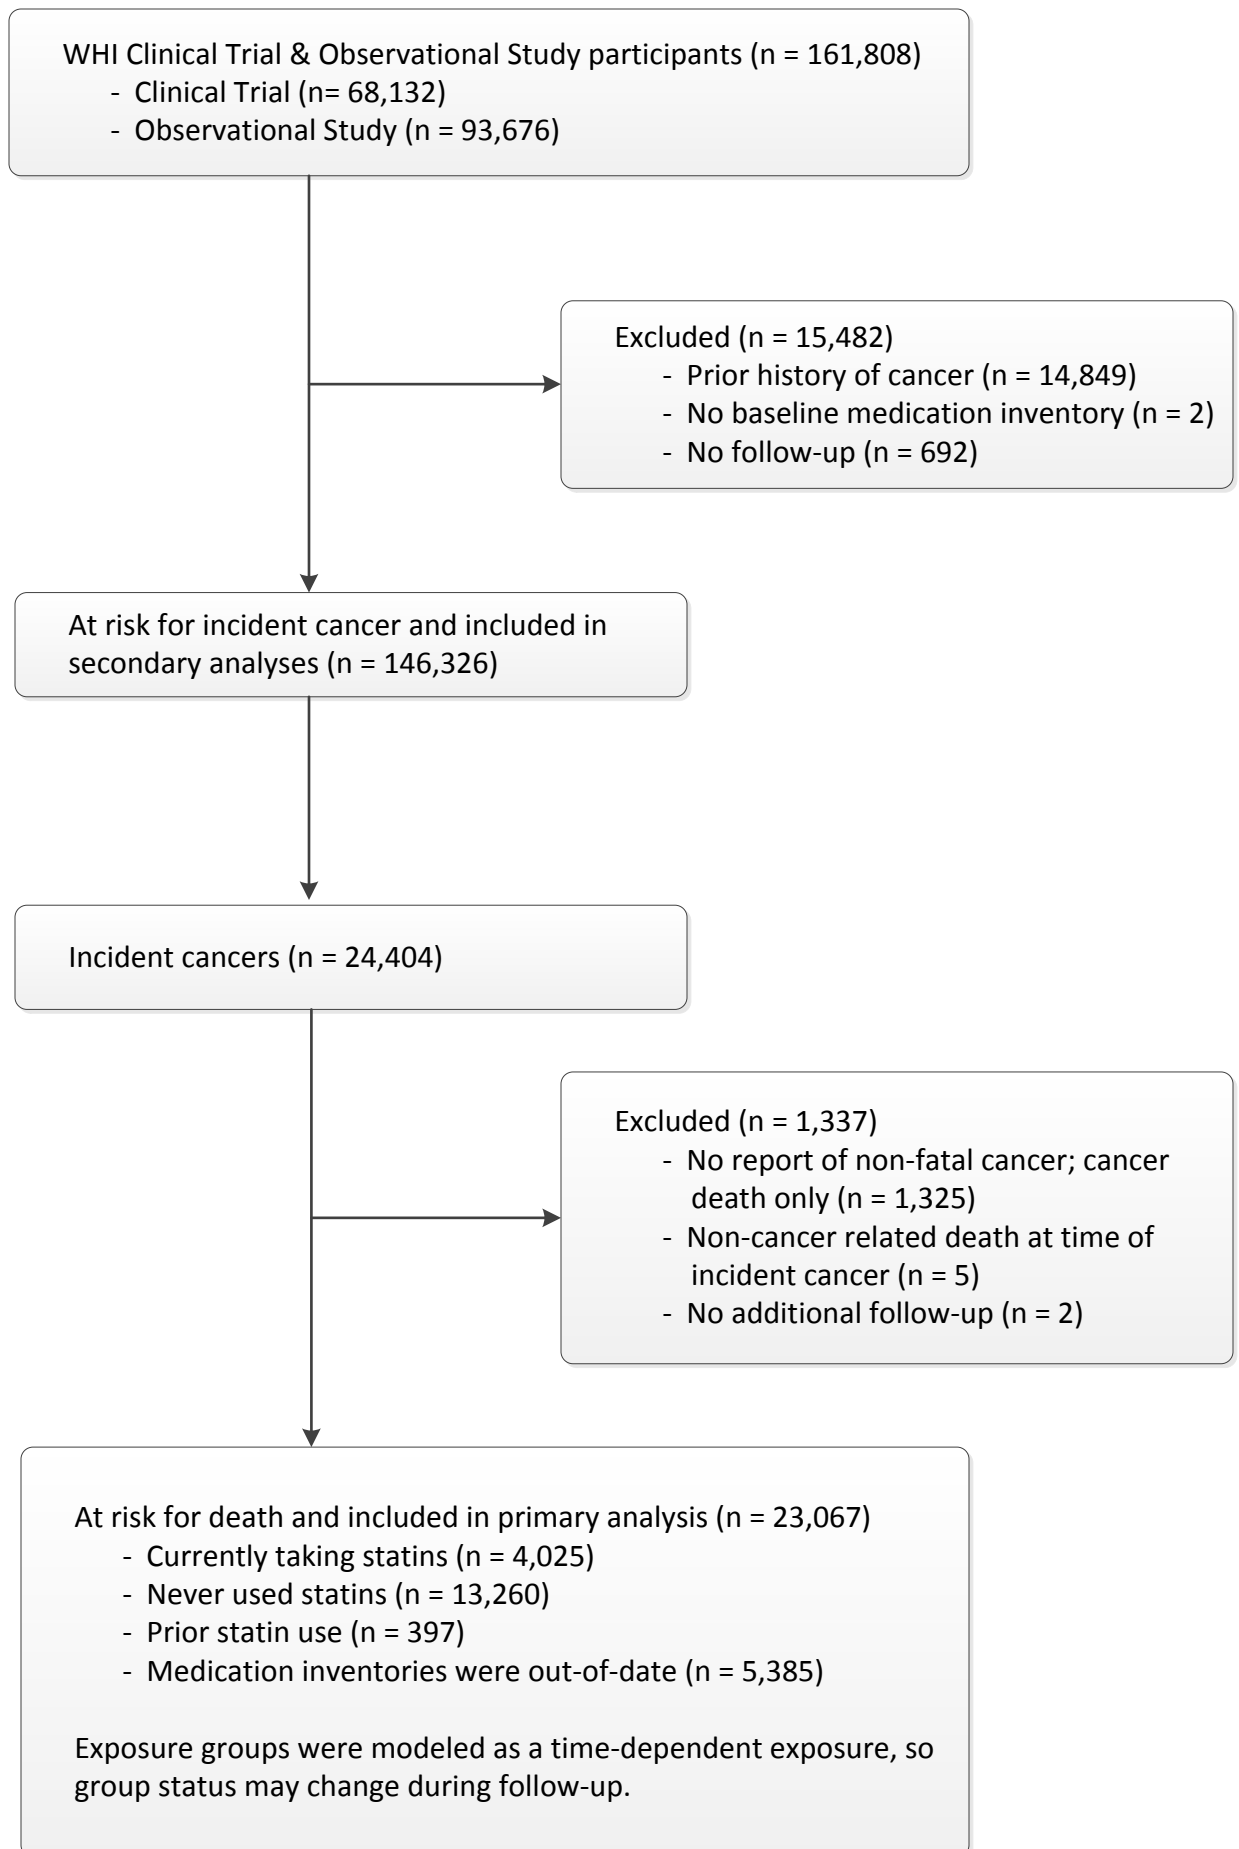

Supplement: bjc2016149x1.pdf [file bjc2016149x1.pdf]
